# Supplementary material for: Structural control in the nanoassembly of the tungsten and molybdenum dithiolene complex analog
Source: Royal Society of Chemistry journal article supplement (doi:10.1039/d2re00205a), 2022-01-01
Supplement: d2re00205a1.pdf [file d2re00205a1.pdf]

# Supporting Information:

## Structural Control in Nano-assembly of Tungsten and Molybdenum Dithiolene Complex Analog

Jagannath Bhuyan,<sup>a</sup> Bholanath Pakhira,<sup>b</sup> Ameerunisha Begum,<sup>c†</sup> Sabysachi Sarkar<sup>\*d</sup> and  
Kumud Malika Tripathi<sup>\*e</sup>

<sup>a</sup> Department of Chemistry, North Eastern Regional Institute of Science and Technology,  
Nirjuli-791109, India

<sup>b</sup> Department of Chemistry, Sister Nibedita Govt. General Degree College for Girls, Hastings  
House, Alipore, Kolkata: 700027, India

<sup>c</sup> Department of Chemistry, Faculty of Science, Jamia Hamdard University, New Delhi,  
110062, India

<sup>d</sup> Ramakrishna Mission Vidyamandira, Belurmath, Howrah 711 202, West Bengal, India

<sup>e</sup> Department of Chemistry, Indian Institute of Petroleum and Energy, Visakhapatnam  
530003,  
India

<sup>†</sup>Deceased.

### Corresponding Author

E-mail: kumud@iipe.ac.in, kumud20010@gmail.com

---

**Table S1.** X-ray crystallographic data for **1** and **2**.

---

| Compound          | <b>1</b>                                                                                      | <b>2</b>                                                                                      |
|-------------------|-----------------------------------------------------------------------------------------------|-----------------------------------------------------------------------------------------------|
| Empirical formula | C <sub>26</sub> H <sub>58</sub> N <sub>12</sub> O <sub>10</sub> S <sub>8</sub> W <sub>2</sub> | C <sub>20</sub> H <sub>36</sub> Mo <sub>2</sub> N <sub>10</sub> O <sub>8</sub> S <sub>8</sub> |
| Formula weight    | 1323.02                                                                                       | 992.95                                                                                        |
| Temperature (K)   | 100(2)                                                                                        | 100(2)                                                                                        |
| Radiation         | MoK <sub>α</sub>                                                                              | MoK <sub>α</sub>                                                                              |
| Wavelength (Å)    | 0.71073                                                                                       | 0.71073                                                                                       |
| Crystal system    | Triclinic                                                                                     | monoclinic                                                                                    |
| Space group       | <i>P</i> -1                                                                                   | <i>P</i> 2/ <i>c</i>                                                                          |

---

|                                          |                              |                              |
|------------------------------------------|------------------------------|------------------------------|
| a (Å)                                    | 9.311(2)                     | 15.613(5)                    |
| b (Å)                                    | 9.420(2)                     | 8.603(5)                     |
| c (Å)                                    | 15.955(4)                    | 16.257(5)                    |
| $\alpha$ (deg)                           | 72.834(4)                    | 90                           |
| $\beta$ (deg)                            | 74.371(5)                    | 112.417(5)                   |
| $\gamma$ (deg)                           | 62.447(3)                    | 90                           |
| Volume (Å <sup>3</sup> )                 | 1170.9(5)                    | 2018.6(15)                   |
| Z                                        | 1                            | 2                            |
| d <sub>calc.</sub> (mg/cm <sup>3</sup> ) | 1.876                        | 1.634                        |
| F (000)                                  | 654                          | 1004                         |
| $\theta$ range (deg)                     | 2.49 to 26                   | 2.37 to 26                   |
| Reflections collected                    | 6552                         | 11043                        |
| Independent refl.                        | 4489                         | 3951                         |
| R <sub>int.</sub>                        | 0.0320                       | 0.0438                       |
| GOF                                      | 1.105                        | 1.286                        |
| Final R indices [I > 2 $\sigma$ (I)]     | R1 = 0.0692,<br>wR2 = 0.1723 | R1 = 0.1009,<br>wR2 = 0.2892 |
| R indices (all data)                     | R1 = 0.0786,<br>wR2 = 0.1835 | R1 = 0.1233,<br>wR2 = 0.3254 |

**Table S2.** Selected Bond lengths [Å] for **1**

|             |           |             |            |
|-------------|-----------|-------------|------------|
| W(2)-S(2)   | 2.416(4)  | W(2)-S(1)   | 2.433(5)   |
| W(2)-S(4)#1 | 2.457(5)  | W(2)-S(4)   | 2.541(5)   |
| S(3)-W(1)   | 2.131(5)  | S(4)-W(1)#1 | 2.335(3)   |
| S(4)-W(1)   | 2.335(3)  | S(4)-W(2)#1 | 2.457(5)   |
| W(1)-S(4)#1 | 2.335(3)  | W(1)-S(2)   | 2.380(3)   |
| W(1)-S(1)   | 2.418(3)  | W(1)-W(1)#1 | 2.9444(12) |
| S(1)-C(1)   | 1.734(12) | S(2)-C(2)   | 1.754(11)  |

Selected Bond angles [°] for **1**.

|                  |           |                  |           |
|------------------|-----------|------------------|-----------|
| S(2)-W(2)-S(1)   | 79.63(15) | S(2)-W(2)-S(4)#1 | 77.63(14) |
| S(1)-W(2)-S(4)#1 | 135.6(2)  | S(2)-W(2)-S(4)   | 131.8(2)  |

|                  |            |                    |            |
|------------------|------------|--------------------|------------|
| S(1)-W(2)-S(4)   | 74.96(15)  | S(4)#1-W(2)-S(4)   | 92.94(17)  |
| W(1)#1-S(4)-W(1) | 78.19(9)   | W(1)#1-S(4)-W(2)#1 | 39.18(12)  |
| W(1)-S(4)-W(2)#1 | 70.55(12)  | W(1)#1-S(4)-W(2)   | 69.07(12)  |
| W(1)-S(4)-W(2)   | 38.28(11)  | W(2)#1-S(4)-W(2)   | 87.06(17)  |
| S(3)-W(1)-S(4)#1 | 106.34(15) | S(3)-W(1)-S(4)     | 106.08(16) |
| S(4)#1-W(1)-S(4) | 101.81(9)  | S(3)-W(1)-S(2)     | 104.18(15) |
| S(4)#1-W(1)-S(2) | 80.77(10)  | S(4)-W(1)-S(2)     | 147.43(11) |
| S(3)-W(1)-S(1)   | 107.27(15) | S(4)#1-W(1)-S(1)   | 144.62(12) |
| S(4)-W(1)-S(1)   | 79.13(10)  | S(2)-W(1)-S(1)     | 80.66(9)   |
| S(3)-W(1)-W(1)#1 | 116.28(14) | S(4)#1-W(1)-W(1)#1 | 50.91(7)   |
| S(4)-W(1)-W(1)#1 | 50.90(8)   | S(2)-W(1)-W(1)#1   | 122.75(8)  |
| S(1)-W(1)-W(1)#1 | 119.80(7)  | C(1)-S(1)-W(1)     | 07.7(4)    |
| C(1)-S(1)-W(2)   | 102.3(4)   | W(1)-S(1)-W(2)     | 38.77(11)  |
| C(2)-S(2)-W(1)   | 108.2(4)   | C(2)-S(2)-W(2)     | 102.6(4)   |

#### Selected Bond lengths [Å] for **2**

|              |          |               |            |
|--------------|----------|---------------|------------|
| Mo(1)-S(4)   | 1.900(6) | Mo(1)-S(3)    | 2.323(2)   |
| Mo(1)-S(3)#1 | 2.348(3) | Mo(1)-S(2)    | 2.393(2)   |
| Mo(1)-S(1)   | 2.420(2) | Mo(1)-Mo(1)#1 | 2.8310(16) |
| S(3)-Mo(1)#1 | 2.348(3) | S(1)-C(1)     | 1.733(9)   |

#### Selected Bond angles [°] for **2**.

|                      |            |                    |            |
|----------------------|------------|--------------------|------------|
| S(4)-Mo(1)-S(3)      | 111.16(18) | S(4)-Mo(1)-S(3)#1  | 108.21(17) |
| S(3)-Mo(1)-S(3)#1    | 99.30(9)   | S(4)-Mo(1)-S(2)    | 107.49(18) |
| S(3)-Mo(1)-S(2)      | 139.46(11) | S(3)#1-Mo(1)-S(2)  | 79.53(8)   |
| S(4)-Mo(1)-S(1)      | 101.40(16) | S(3)-Mo(1)-S(1)    | 79.30(9)   |
| S(3)#1-Mo(1)-S(1)    | 148.51(10) | S(2)-Mo(1)-S(1)    | 81.62(8)   |
| S(4)-Mo(1)-Mo(1)#1   | 100.76(14) | S(3)-Mo(1)-Mo(1)#1 | 53.11(6)   |
| S(3)#1-Mo(1)-Mo(1)#1 | 52.28(6)   | S(2)-Mo(1)-Mo(1)#1 | 129.86(7)  |
| S(1)-Mo(1)-Mo(1)#1   | 132.09(6)  | Mo(1)-S(3)-Mo(1)#1 | 74.61(8)   |

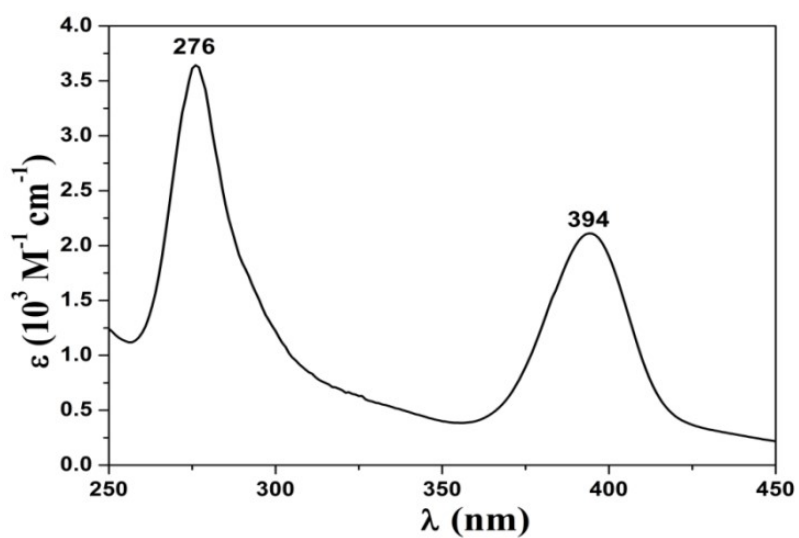

**Fig. S1** Electronic absorption spectrum of **1** in water.

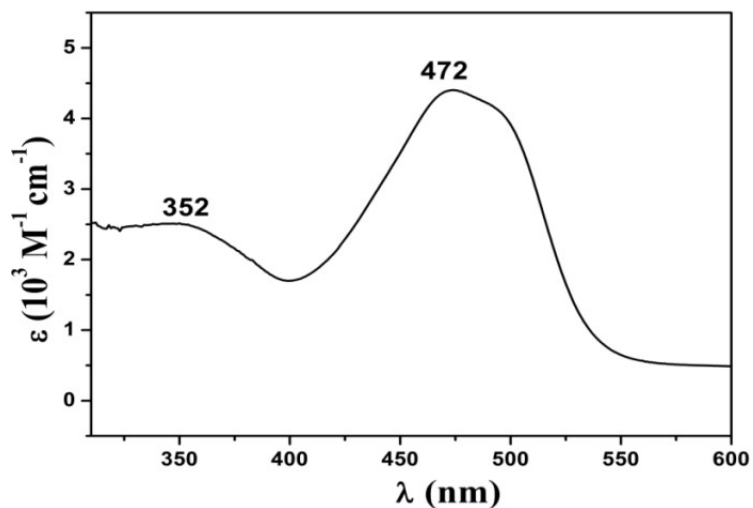

**Fig. S2** Electronic absorption spectrum of **2** in water.

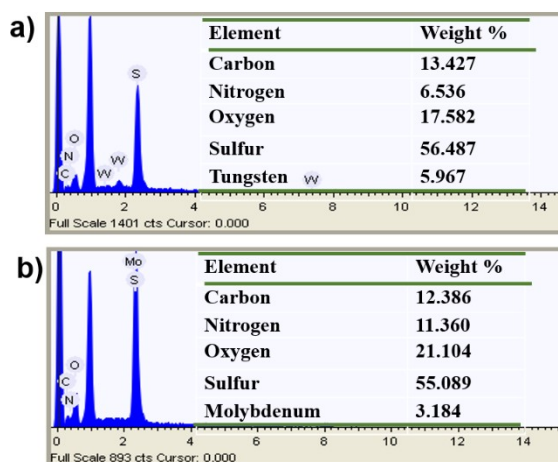

**Fig. S3** EDAX analysis with percentage elemental compositions of the nanoflowers of the **1** (a) and **2** (b).

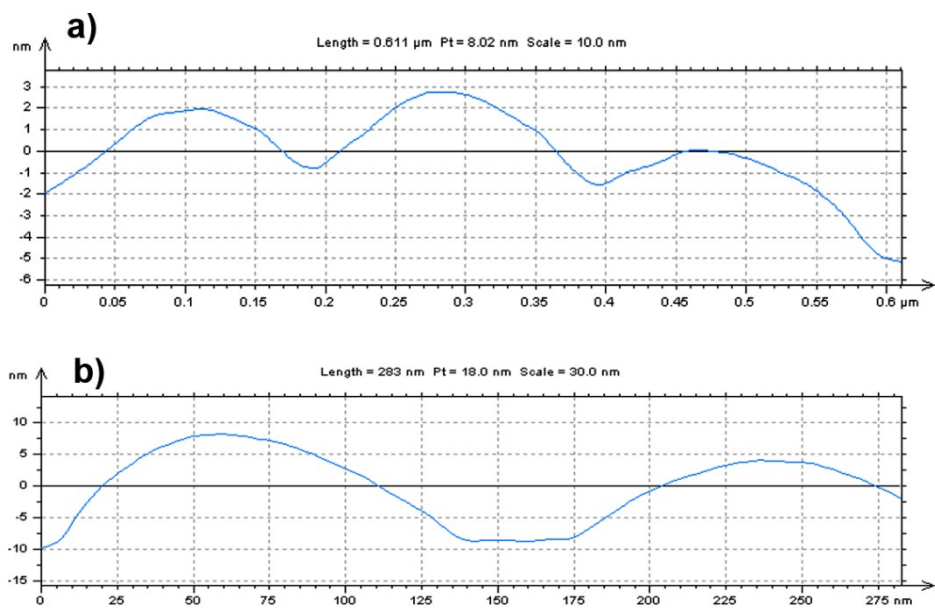

**Fig. S4 (a)** AFM line profile of **1**, and **(b)** **2** on HOPG matrix.
